# Supplementary material for: QTL Mapping of Resistance to Bacterial Wilt in Pepper Plants (Capsicum annuum) Using Genotyping-by-Sequencing (GBS)
Source: MDPI journal article supplement (doi:10.3390/horticulturae8020115), 2022-01-27
Supplement: s1 [file s1]

**Table S1.** Genotyping-by-sequencing (GBS) statistics for 96 samples

| File Name                                 | Sum             |
|-------------------------------------------|-----------------|
| Number of total reads                     | 715,257,004     |
| Total length of reads (bp)                | 108,003,807,604 |
| Number of trimmed reads                   | 580,490,466     |
| Average trimmed reads                     | 6,046,776       |
| Total length of trimmed reads (bp)        | 69,674,498,092  |
| Number of mapped reads                    | 535,702,448     |
| Average length of trimmed reads (bp)      | 119.99          |
| Total trimmed raw data                    | 94.45%          |
| Average number of mapped reads            | 5,216,741       |
| Average number of mapped regions          | 125,718         |
| Average depth of the mapped regions       | 14.75           |
| Average length of the mapped regions (bp) | 233.34          |

**Table S2.** Single-nucleotide polymorphism (SNP) filter criteria

| Filter Criteria                    | Number of SNPs |
|------------------------------------|----------------|
| Number of total SNPs               | 628,437        |
| Missing data < 30%                 | 61,967         |
| MAF (minor allele frequency) > 25% | 146,217        |
| Missing < 30 % and MAF > 25%       | 11,020         |
| Homozygous SNP in KC352            | 4,387          |
| 100kb window sized selection       | 1,643          |
| Polymorphic SNPs between parents   | 1,639          |
